# Supplementary material for: Selective voltammetric detection of dopamine in the presence of ascorbateElectronic supplementary information (ESI) available: experimental details, cell compositions, methodology. See http://www.rsc.org/suppdata/cc/b3/b316493d/
Source: Royal Society of Chemistry journal article supplement (doi:10.1039/b316493d), 2004-01-01
Supplement: b316493d.doc [file b316493d.doc]

Electronic Supplementary Information (ESI).

**Selective voltammetric detection of dopamine in the presence of ascorbate**

Damien W. M. Arrigan, Mihaela Ghita, Valerio Beni

NMRC, University College, Lee Maltings, Prospect Row, Cork, Ireland and

Department of Chemistry, University of Salford, Salford UK M5 4WT.

The cell used for the study of ion transfer at ITIES was a four-electrode cell. The organic phase was 1,2-dichloroethane. The interface was located between two Luggin capillaries. We assume that the interface is completely flat, with an area of 1.13 cm2. The interface was polarized by two reference electrodes (Ag/AgCl on the organic side of the interface and Ag/Ag2SO4) on the aqueous side of the interface. Counter electrodes (platinum mesh spot welded to platinum wire) were immersed in each phase for current collection. The organic phase counter electrode was sealed in a glass tube to avoid the contact with aqueous solution, through which it was inserted into the organic phase. Electrochemical measurements were performed using a PGSTAT30 potentiostat/galvanostat, (EcoChemie, The Netherlands) or CHI potentiostats (1100 620) (CH Instruments, Austin, Texas). All experiments were carried out at room temperature.

The following electrochemical cell was employed for the investigations:

where the double vertical lines represents the polarized interface. Y and Z are the concentrations of dopamine and ascorbate used, respectively. All reagents and solvent were purchased from local suppliers and used as received. The organic phase supporting electrolytes, bis(triphenylphosphoranylidene ammonium tetraphenylborate (BTPPATPB) or bis(triphenylphosphoranylidene ammonium tetrakis(4-chlorophenyl)borate (BTPPATCB), were prepared according to published procedures.[[1]](#footnote-2) All potentials are reported with respect to the experimentally used reference electrodes. Tetramethylammonium cation had a half-wave transfer potential of 0.545 V when the organic phase was BTPPATPB and 0.598 V when the organic phase was BTPPATCB.

The aqueous phase was always 0.01 M lithium sulfate; its pH was in the region of pH 6-7, ensuring that the dopamine was protonated and the ascorbic acid was de-protonated.

The diffusion coefficients were calculated from plots of peak current versus square root of sweep rate in conjunction with the Randles-Sevcik equation[[2]](#footnote-3)

(where *ip* is the peak current, *z* is the charge of the transferring ion, *A* is the interfacial area, *D* is the diffusion coefficient, *Cb* is the bulk solution phase concentration of the substance being measured and *v* is the voltammetric sweep rate).

The slightly high values for the diffusion coefficient of dopamine in the aqueous phase when the organic phase contained BTPPATPB is attributed to the transfer potential of dopamine occurring close to the upper potential limit with this electrolyte, resulting is a high background signal which was not simple to negate. This problem was alleviated by the use of BTPPATCB, which offers a wider potential window due to the more difficult transfer of the TCB- anions from organic to aqueous phase.

Calibration plots consisted of plots of the peak current for dopamine transfer voltammetry versus the aqueous phase concentration of dopamine.

1. Y. Shao, A.A. Stewart, H.H. Girault, J. Chem. Soc. Faraday Trans., 1991, 87, 2593. [↑](#footnote-ref-2)
2. A.J. Bard and L.R. Faulkner, Electrochemical Methods, 2nd edition, Wiley, New York, 2001, p. 231. [↑](#footnote-ref-3)
